# Supplementary material for: Metformin produces growth inhibitory effects in combination with nutlin-3a on malignant mesothelioma through a cross-talk between mTOR and p53 pathways
Source: Springer Nature journal article supplement (doi:10.1186/s12885-017-3300-y), 2017-05-02

**Figure S2**

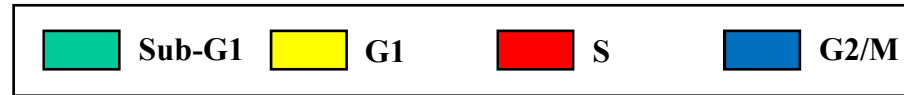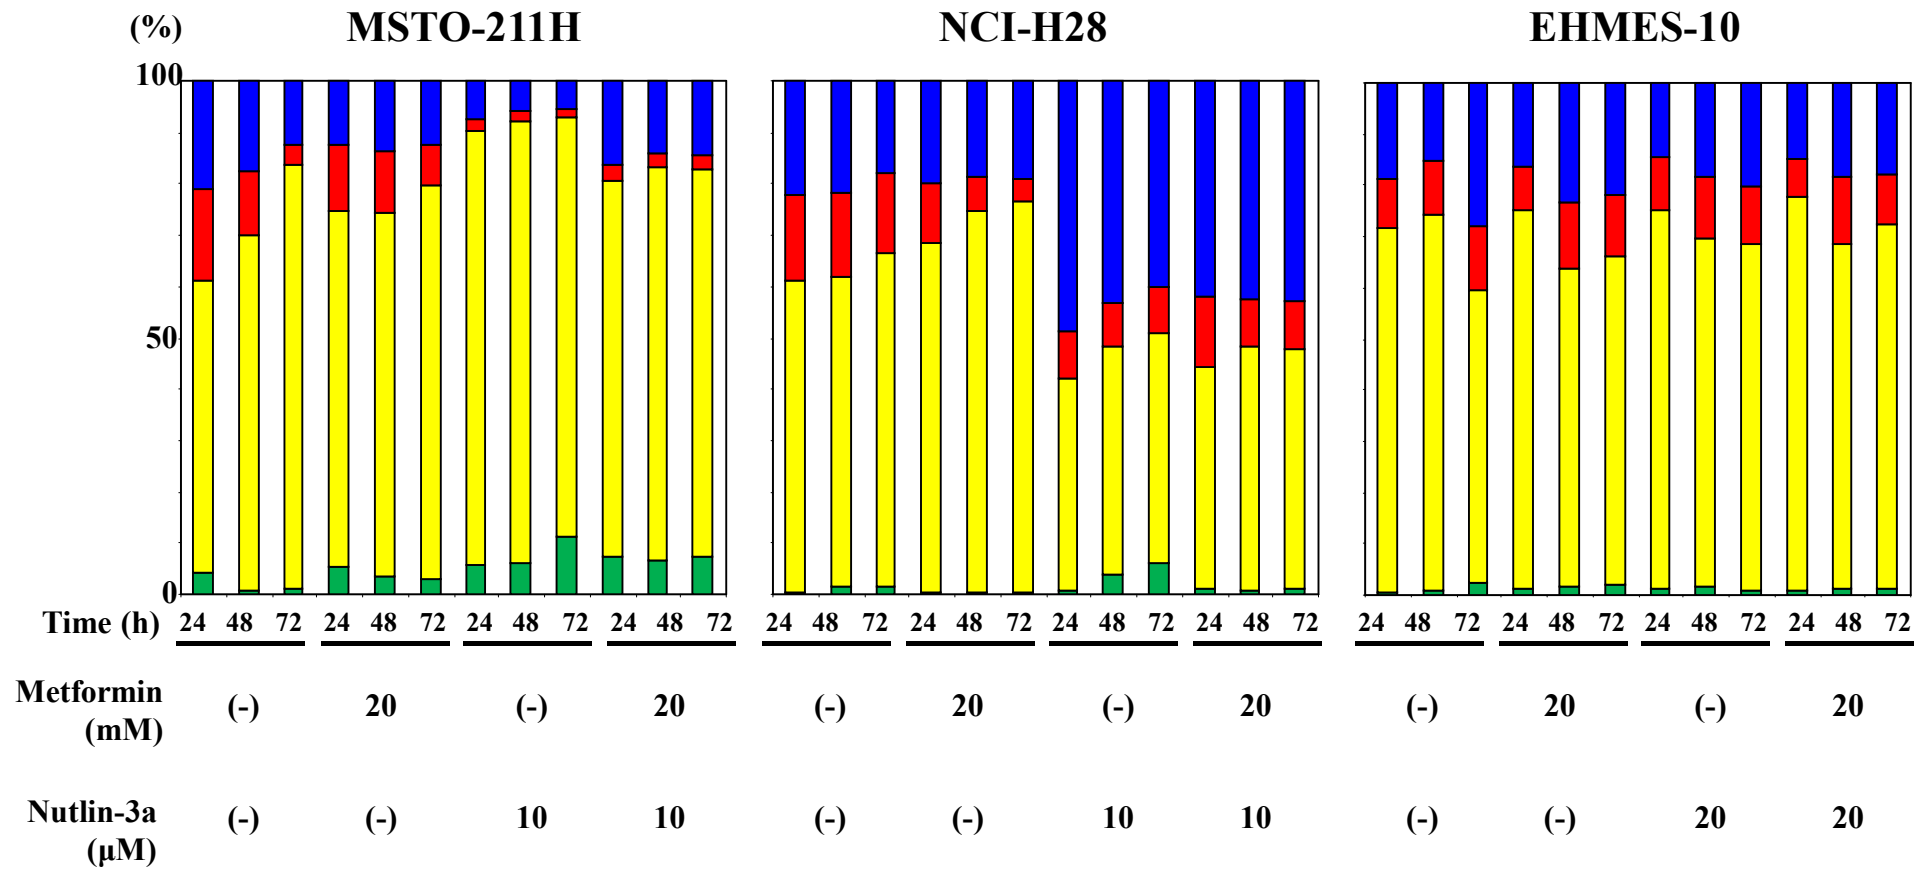

# Supplementary Figure 2 (continued)

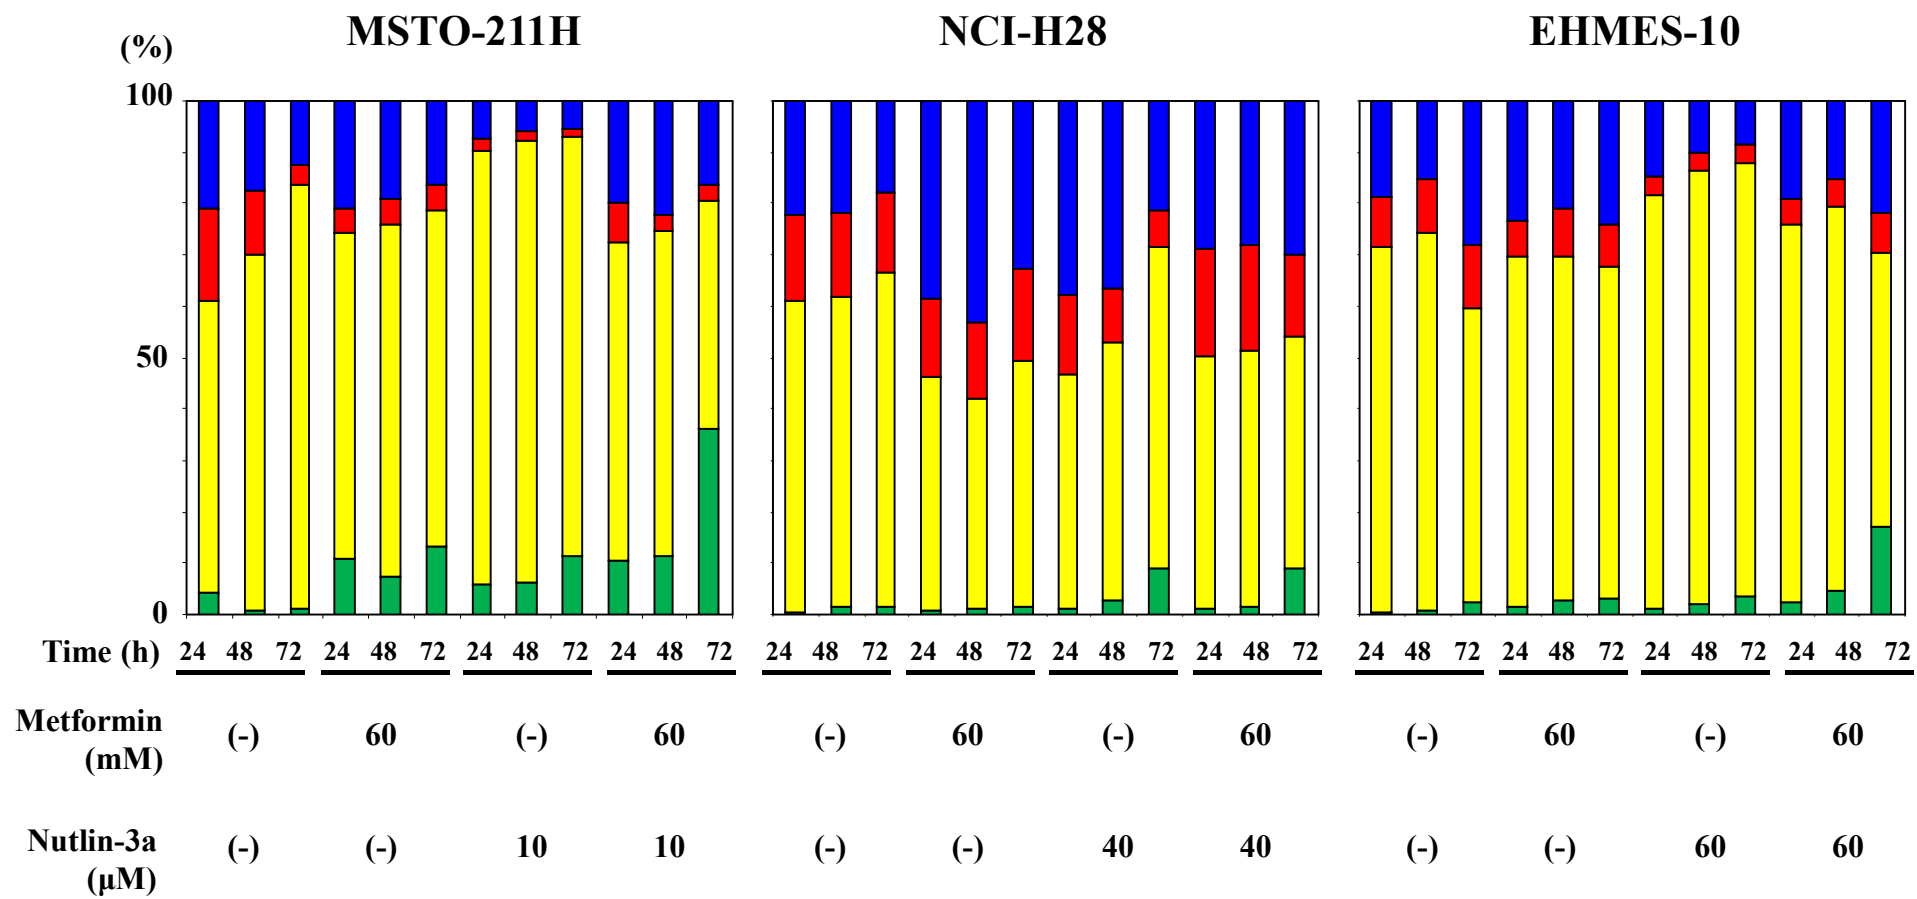

Supplement: MOESM3 [file 12260540]
